# Supplementary material
Source: PubMed Central journal article supplement (PMC9840150)
Supplement: mmc1.pdf [file mmc1.pdf]

YMTHE, Volume 31

## Supplemental Information

**NAMPT is a metabolic checkpoint of**

**IFN $\gamma$ -producing CD4<sup>+</sup> T cells in lupus nephritis**

**Mengyuan Li, Yimei Lai, Binfeng Chen, Chaohuan Guo, Mianjing Zhou, Siyuan Zhao, Shuyi Wang, Jin Li, Niansheng Yang, and Hui Zhang**

Supplementary Table 1. **Demographics and clinical characteristics of SLE patients and healthy controls.**

|                                        | SLE (N=110)   | HC (N=95)  |
|----------------------------------------|---------------|------------|
| Age (year)                             | 35.8 ± 13.2   | 31.3 ± 3.8 |
| Gender (male/female)                   | 8/102         | 16/79      |
| SLEDAI                                 | 10.9 ± 6.2    | /          |
| ANA (IU/ml)                            | 221.4 ± 109.0 | /          |
| Anti-dsDNA antibodies (IU/ml)          | 140.1 ± 130.7 | /          |
| ESR (mm/h)                             | 47.2 ± 36.4   | /          |
| C3 (g/L)                               | 0.6 ± 0.3     | /          |
| C4 (g/L)                               | 0.1 ± 0.1     | /          |
| IgG (g/L)                              | 14.2 ± 7.3    | /          |
| Serum Creatinine (µmol/L)              | 108.9 ± 123.7 | /          |
| White blood cells (10 <sup>9</sup> /L) | 6.6 ± 3.5     | /          |
| Albumin (g/L)                          | 31.7 ± 7.5    | /          |
| Platelet (10 <sup>12</sup> /L)         | 205.9 ± 86.6  | /          |
| Urinary proteins (g/24 h)              | 3.0 ± 4.2     | /          |
| Microscopic hematuria (no., RBC/HPF)*  | 53.5 ± 158.9  | /          |
| Medication (%)                         |               | /          |
| Prednisone or methylprednisolone       | 100%          | /          |
| Mycophenolate Mofetil                  | 34.9%         | /          |
| Cyclophosphamide                       | 13.8%         | /          |
| Cyclosporin A                          | 16.5%         | /          |

Notes: All data are expressed as mean ± SD, except where specified. SLEDAI: Systemic Lupus Erythematosus Disease Activity Index, ANA: antinuclear antibodies, C3: Complement Component 3, C4: Complement Component 4. \* red blood cells/high power field

Supplementary Table 2. **Primers used in this study.**

| Gene                            | Forward (5'-3')         | Reverse (5'-3')        |
|---------------------------------|-------------------------|------------------------|
| <i>lfng</i>                     | TCGGTAACTGACTTGAATGTCCA | TCGCTTCCCTGTTTTAGCTGC  |
| <i>Sirtuin 1</i>                | TAGCCTTGTCAGATAAGGAAGGA | ACAGCTTCACAGTCAACTTTGT |
| <i>Sirtuin 2</i>                | TGCGGAACTTATTCTCCCAGA   | GAGAGCGAAAGTCGGGGAT    |
| <i>Sirtuin 3</i>                | ACCCAGTGGCATTCCAGAC     | GGCTTGGGGTTGTGAAAGAAG  |
| <i>Sirtuin 4</i>                | GCTTTGCGTTGACTTTCAGGT   | CCAATGGAGGCTTTCGAGCA   |
| <i>Sirtuin 5</i>                | GCCATAGCCGAGTGTGAGAC    | CAACTCCACAAGAGGTACATCG |
| <i>Sirtuin 6</i>                | CCCACGGAGTCTGGACCAT     | CTCTGCCAGTTTGTCCCTG    |
| <i>Sirtuin 7</i>                | GACCTGGTAACGGAGCTGC     | CGACCAAGTATTTGGCGTTCC  |
| <i><math>\beta</math>-actin</i> | GATCATTGCTCCTCCTGAGC    | CGTCATACTCCTGCTTGCTG   |

## Supplementary Figures and legends

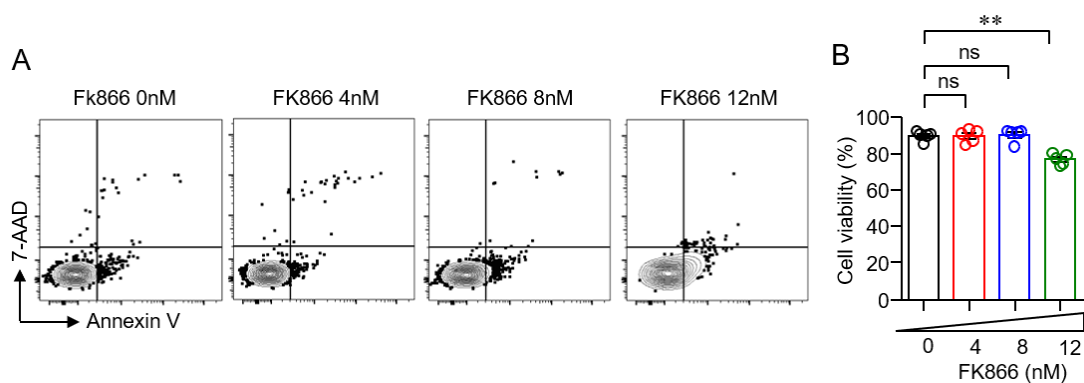

Supplementary Figure 1. **FK866 showed no effects on cell death of CD4<sup>+</sup> T cells.** (A, B) Human CD4<sup>+</sup> T cells were stimulated with anti-CD3/CD28 beads in the presence of different concentrations of FK866 as indicated for 3 d. Cell viability was evaluated for the expression of 7-AAD and Annexin V by flow cytometry. Experiment was repeated 5 times. Data are mean  $\pm$  SEM. \*\* $p < 0.01$  by one-way ANOVA followed by adjustments for multiple comparison. ns: not significant.

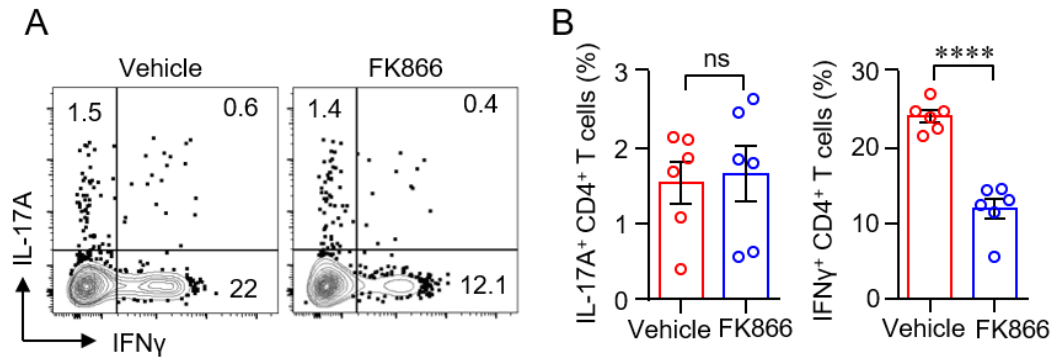

Supplementary Figure 2. **FK866 inhibits IFN $\gamma$  production in T cells.** (A, B) PBMCs were stimulated with OKT3 in the presence or absence of FK866 (8 nM) for 6 d. IFN $\gamma$  and IL-17A expression in CD4<sup>+</sup> T cells were detected by flow cytometry. Data from 6 independent samples. Data are mean  $\pm$  SEM. \*\*\*\* $p$ <0.0001 by Student's t test. ns: not significant.

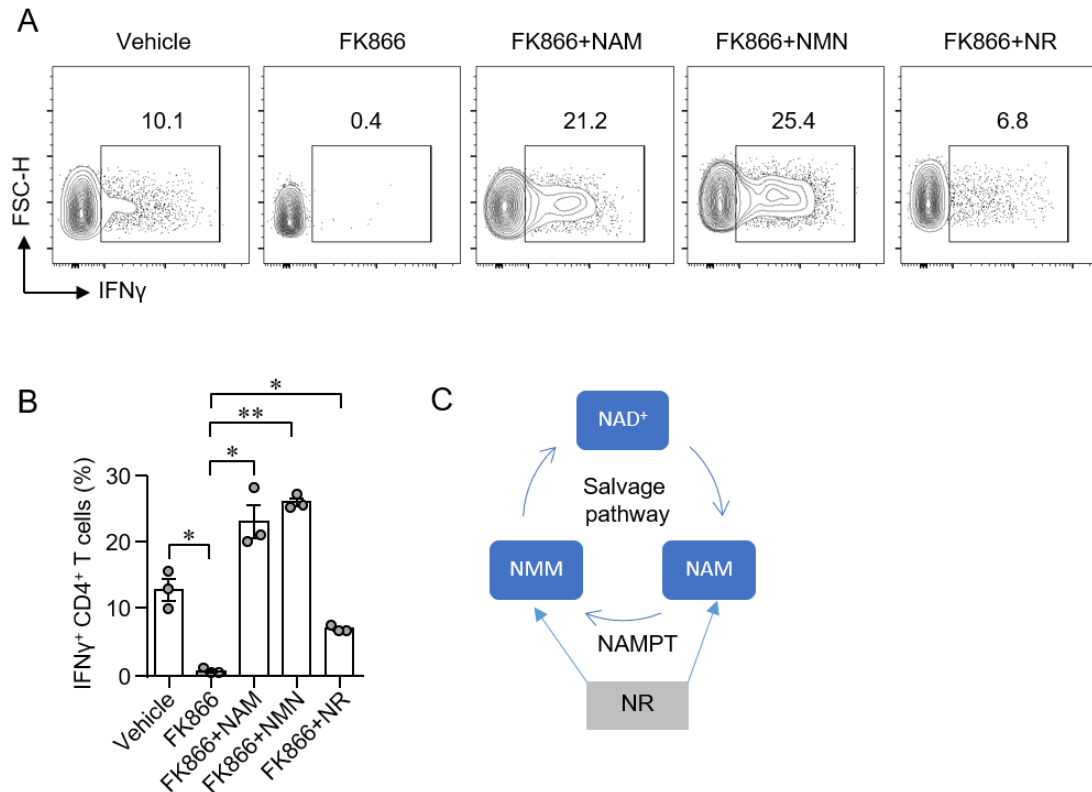

Supplementary Figure 3. **NAMPT-mediated NAD<sup>+</sup> synthesis is required for IFN $\gamma$  production in T cells.** (A, B) CD4<sup>+</sup> T cells were stimulated with anti-CD3/CD28 beads in the presence or absence of FK866 (8 nM). NAM (1  $\mu$ M), NMN (1 mM) or NR (1  $\mu$ M) was included in some of the experiments. IFN $\gamma$  expression was determined by flow cytometry. Data from 3 independent samples. (C) Salvage pathway of NAD<sup>+</sup> metabolism. Data are mean  $\pm$  SEM. \* $p$ <0.05, \*\* $p$ <0.01 by one-way ANOVA followed by adjustments for multiple comparisons.

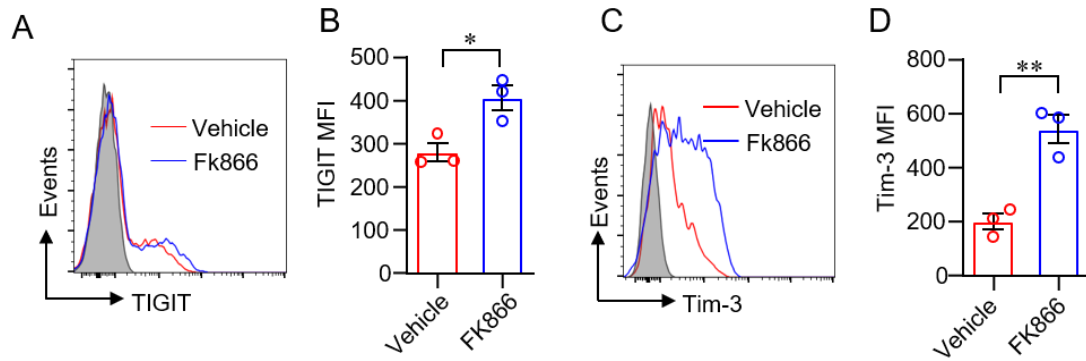

Supplementary Figure 4. **FK866 induced TIGIT and Tim-3 expression.** CD4<sup>+</sup> T cells were stimulated with anti-CD3/CD28 beads in the presence or absence of FK866 (8 nM). (A, B) TIGIT expression in CD4<sup>+</sup> T cells were detected by flow cytometry. Data from 3 independent samples. (C, D) Tim-3 expression in CD4<sup>+</sup> T cells were detected by flow cytometry. Data from 3 independent samples. Data are mean  $\pm$  SEM. \* $p < 0.05$ , \*\* $p < 0.01$  by Student's t test.

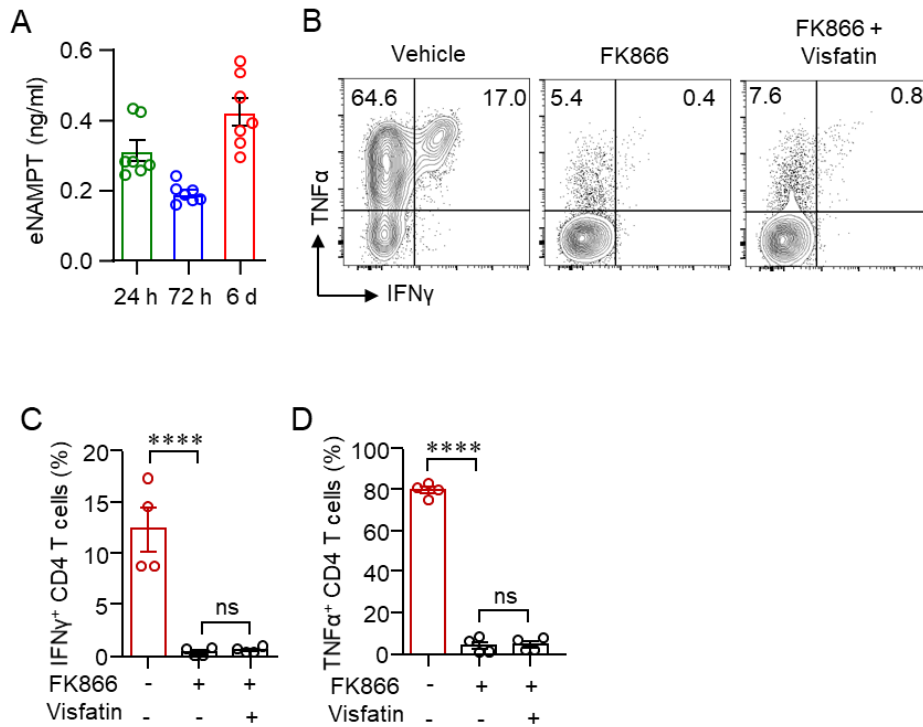

Supplementary Figure 5. **Extracellular NAMPT could not reverse FK866's inhibition on CD4<sup>+</sup> T cells.** (A) CD4<sup>+</sup> T cells were stimulated with anti-CD3/CD28 beads. The concentration of extracellular NAMPT (eNAMPT) in the supernatant of CD4<sup>+</sup> T cells at different time points were measured by ELISA. (B-D) CD4<sup>+</sup> T cells were stimulated with anti-CD3/CD28 beads for 3 d. FK866 and Visfatin (200 ng/ml) were included during cell cultured as indicated. IFNγ and TNFα expression was measured by flow cytometry (n=4). \*\*\*\*  $p < 0.0001$  by one-way ANOVA followed by adjustments for multiple comparisons. ns: not significant.



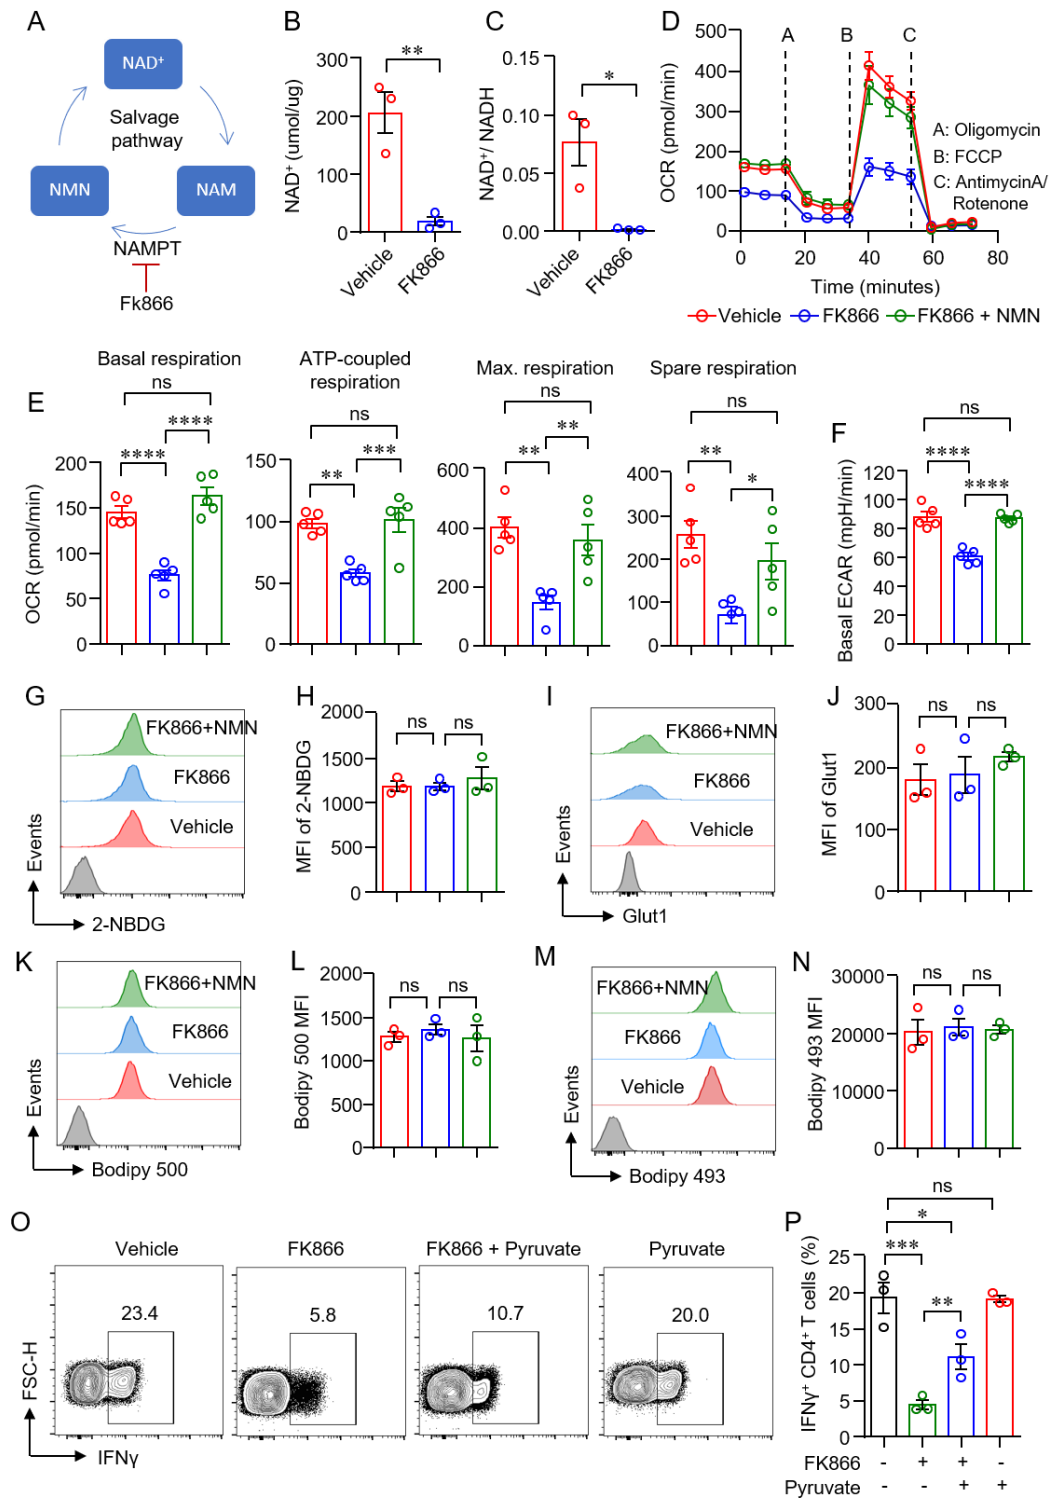

Supplementary Figure 6. **FK866 suppressed cellular energy metabolism in**

**CD4<sup>+</sup> T cells independent of glucose and lipid uptake.** (A) Graph illustrated

NAMPT in NAD<sup>+</sup> salvage pathway. (B, C) CD4<sup>+</sup> T cells were stimulated with

anti-CD3/CD28 beads in the presence or absence of FK866 for 3 d. NAD<sup>+</sup>/NADH in CD4<sup>+</sup> T cells was measured using a WST-8 based colorimetric assay (n=3). (D-F) CD4<sup>+</sup> T cells were stimulated with anti-CD3/CD28 beads in the presence of FK866. NMN (1 mM) was added to reverse FK866. Metabolic activities were measured by a Seahorse XF96 analyzer. Oxygen consumption rate (OCR) of basal respiration, respiration coupled to ATP production, maximal (Max.) respiration, spared respiratory capacity and basal extracellular acidification rates (ECAR) were summarized from 5 independent samples. (G-J) Human CD4<sup>+</sup> T cells were stimulated with anti-CD3/CD28 beads in the presence of FK866 (8 nM) for 3 d. Uptake of 2-NBDG (G, H) and Glut1 expression (I, J) were measured by flow cytometry. Data from 3 independent samples. (K-N) Cells were incubated with Bodipy 493 (lipid uptake) and Bodipy 500 (lipid content) for lipid measurement by flow cytometry (n=3). (O, P) Human CD4<sup>+</sup> T cells were stimulated with anti-CD3/CD28 beads in the presence of FK866 (8 nM) for 3 d. Pyruvate (2 μM) was added in some of the experiments. IFN $\gamma$  expression was measured by flow cytometry. Data are mean  $\pm$  SEM. \* $p$ <0.05, \*\* $p$ <0.01, \*\*\* $p$ <0.001, \*\*\*\* $p$ <0.0001 by one-way ANOVA followed by adjustments for multiple comparisons in panels E, F, H, J, L, N and P and Student's test in panels B and C. ns: not significant.

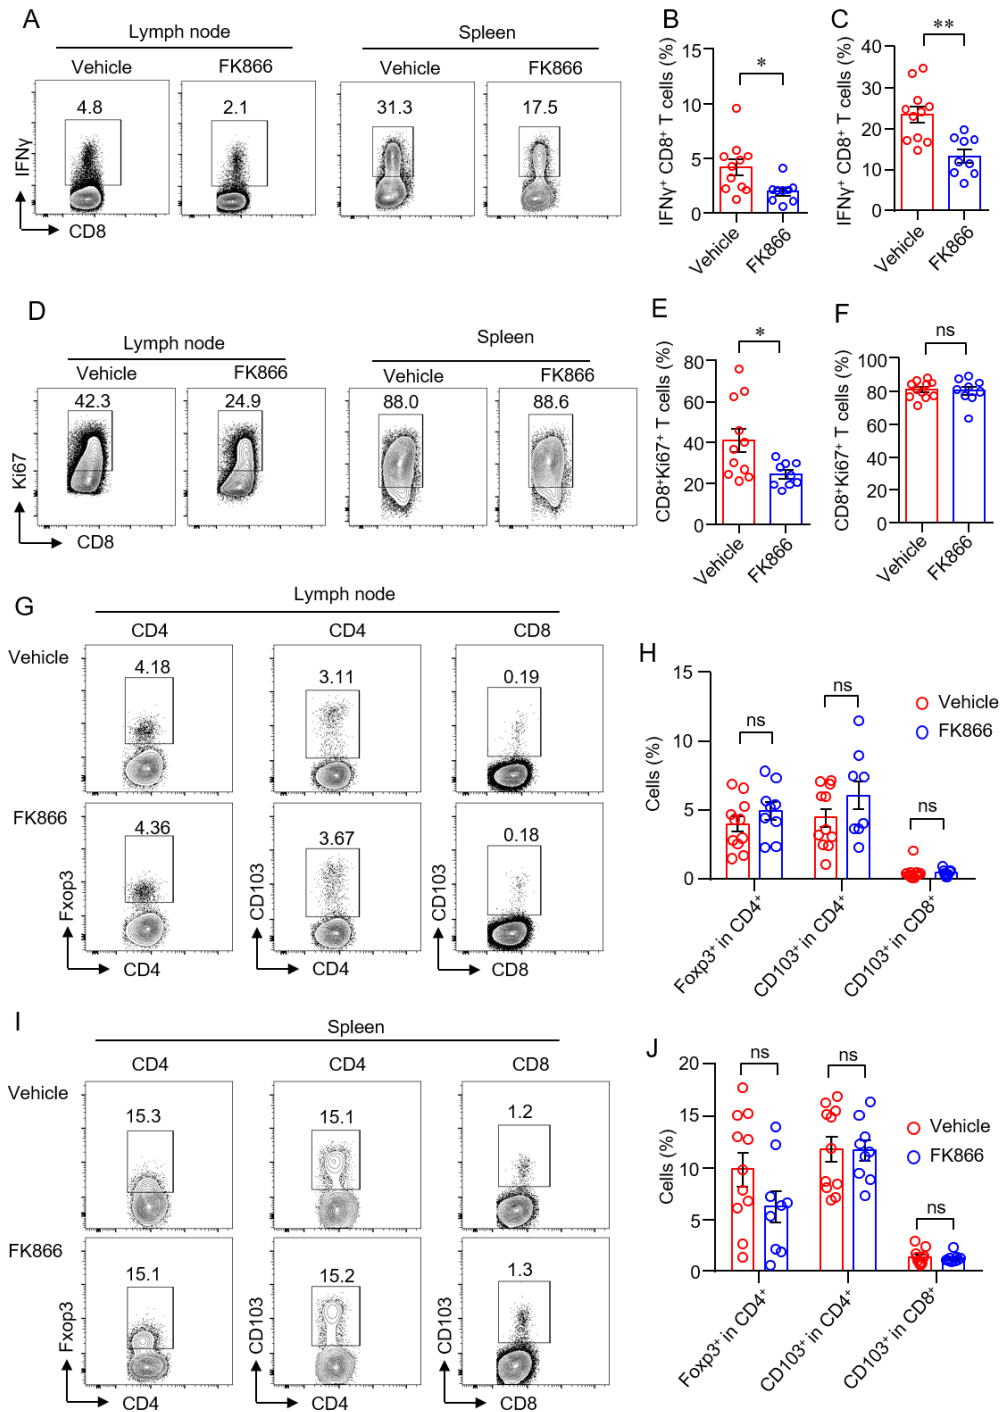

Supplementary Figure 7. **Impacts of FK866 on T cells in the lymphoid organs of MRL/lpr mice.** MRL/lpr mice were treated with FK866 as in Fig. 6A. Single cell suspension were prepared from spleens or kidney draining lymph nodes (DLN). (A-F) IFN $\gamma$  and Ki-67 expression in CD8<sup>+</sup> T cells from spleen or kidney DLN was measured by flow cytometry. (G-J) Foxp3 and CD103

expression in CD4<sup>+</sup> and CD8<sup>+</sup> T cells from kidney DLN or spleen were measured by flow cytometry. Data are mean  $\pm$  SEM. \* $p$ <0.05, \*\* $p$ <0.01 by Student's t test. ns: not significant.

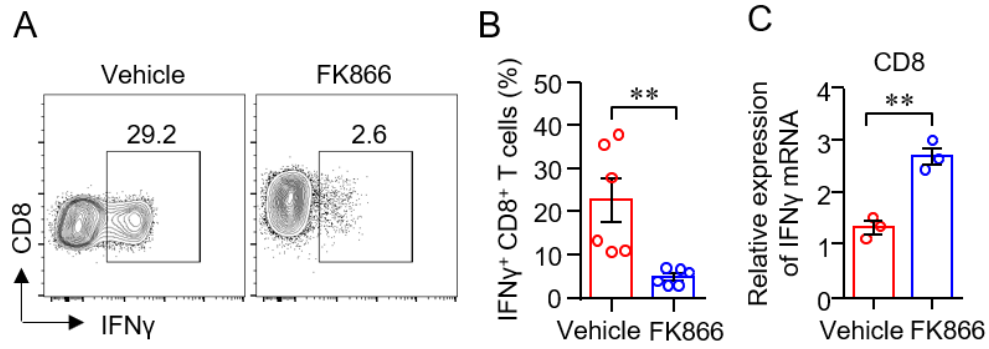

Supplementary Figure 8. **FK866 inhibited IFN $\gamma$  production but induced *Ifng* mRNA.** CD8<sup>+</sup> T cells were stimulated with anti-CD3/CD28 beads for 6 d. FK866 was added to the culture 4 h before stimulation with ionomycin, PMA and BFA. IFN $\gamma$  expression was measured by flow cytometry (A, B) and qPCR (C). Data are mean  $\pm$  SEM. \*\* $p < 0.01$  by Student's t test.

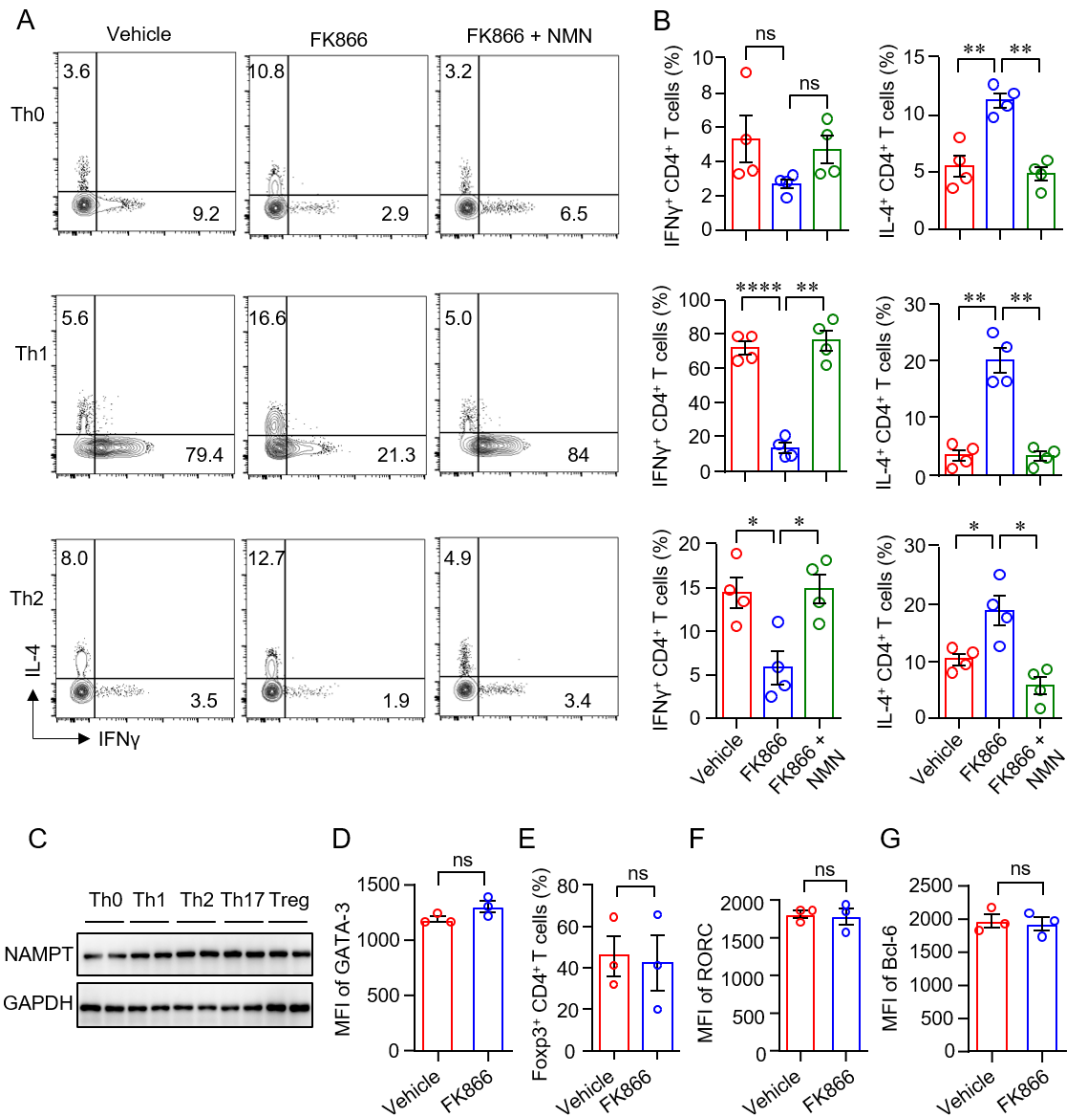

Supplementary Figure 9. **NAMPT in CD4<sup>+</sup> T cell differentiation.** Naïve human CD4<sup>+</sup> T cells were stimulated with anti-CD3/CD28 beads under different Th cell differentiation conditions. (A, B) Naïve CD4<sup>+</sup> T cells were cultured under Th1 and Th2 differentiation conditions for 6 d. IFN $\gamma$  and IL-4 expression in CD4<sup>+</sup> T cells were measured by flow cytometry. Data from 4 independent samples. (C-G) Naïve CD4<sup>+</sup> T cells were cultured under Th0, Th1, Th2, Th17, Treg cell differentiation conditions for 6 d. (C) NAMPT expression was measured by western blot. Representative bands of 4 samples. (D-G) GATA-3, Fopx3, RORC

and Bcl-6 expression in CD4<sup>+</sup> T cells were measured by flow cytometry. Data from 3 independent samples. Data are mean  $\pm$  SEM. \* $p$ <0.05, \*\* $p$ <0.01, \*\*\*\* $p$ <0.0001 by one-way ANOVA followed by adjustments for multiple comparisons in panel B and Student's t test in panels D-G. ns: not significant.

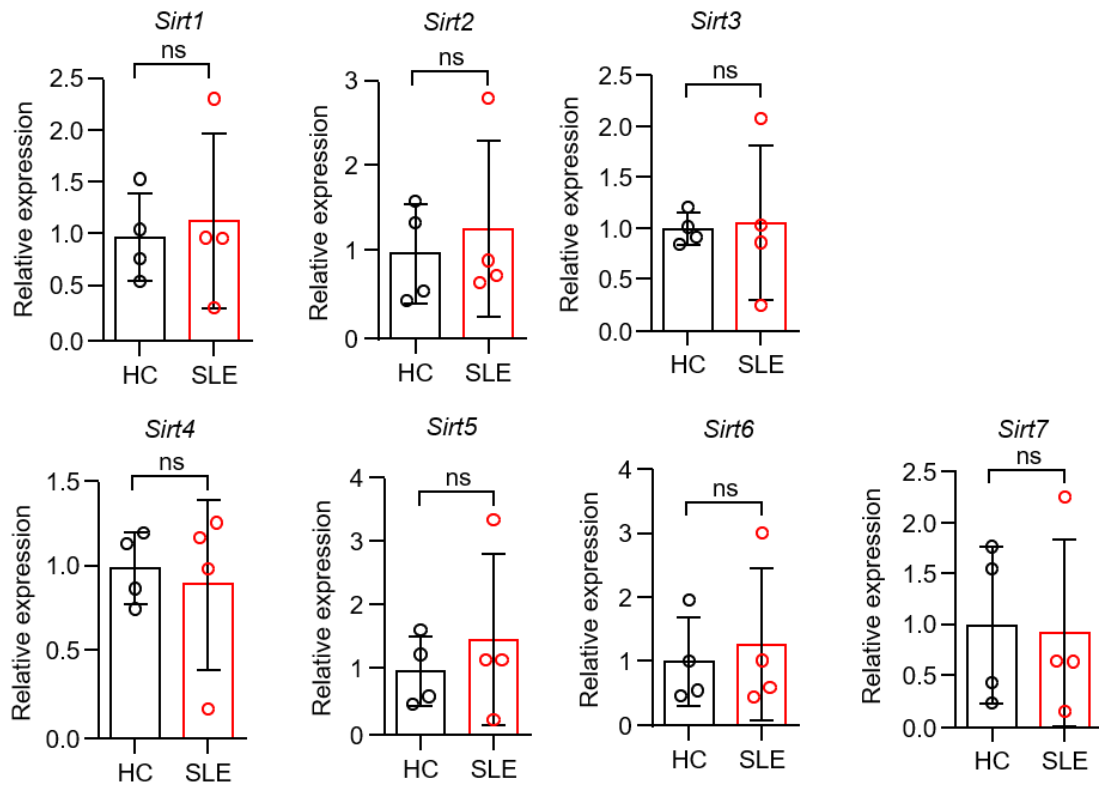

Supplementary Figure 10. **Sirtuins in CD4<sup>+</sup> T cells were not different between healthy controls and patients with SLE.** CD4<sup>+</sup> T cells were isolated from patients with SLE or HC. Transcripts of Sirt1, Sirt2, Sirt3, Sirt4, Sirt5, Sirt6, and Sirt7 in CD4<sup>+</sup> T cells were measured by qPCR. n=4. ns: not significant by Student's t test.
